# Supplementary material
Source: publisher figshare collection journal article supplement (https://tandf.figshare.com/ndownloader/files/13079714)
Supplement: Supplementary file 1 [file 13079714]

**Synthesis of PAMAM dendrimer and its derivative PAMOL: Determination of thermophysical properties by DFT**

Indumoni Dasa, Hirok Jyoti Boraha, Diganta Sarmab and Swapnali Hazarikaa*

*aChemical Engineering Group, Engineering Science and Technology Division*

# *CSIR-North East Institute of Science and Technology*

*Jorhat – 785 006, Assam, India*

*bDepartment of Chemistry, Dibrugarh University*

*Dibrugarh-786004, Assam, India*

*Author for correspondence

*Email:* [*shrrljt@yahoo.com*](mailto:shrrljt@yahoo.com)

*Phone: ++913762370012; Fax No: ++913762370011*

Table of Contents

Sl No Description

1 . Fig. SI1: 1H NMR spectra of G-0.5 generation PAMAM dendrimer

2. Fig. SI2: 13C NMR spectra of G-0.5 generation PAMAM dendrimer

3. Fig. SI3: IR spectra of G-0.5 generation PAMAM dendrimer

4. Fig. SI4: 1H NMR spectra of G0 generation PAMAM dendrimer

5. Fig. SI5: 13C NMR spectra of G0 generation PAMAM dendrimer

6. Fig. SI6: IR spectra of G0 generation PAMAM dendrimer

7. Fig. SI7: 1H NMR spectra of hydroxy substituted PAMOL dendrimer

8. Fig. SI8: 13C NMR spectra of hydroxy substituted PAMOL dendrimer

9. Fig. SI9: IR spectra of hydroxy substituted PAMOL dendrimer

**IR, NMR Spectra of Dendrimers**


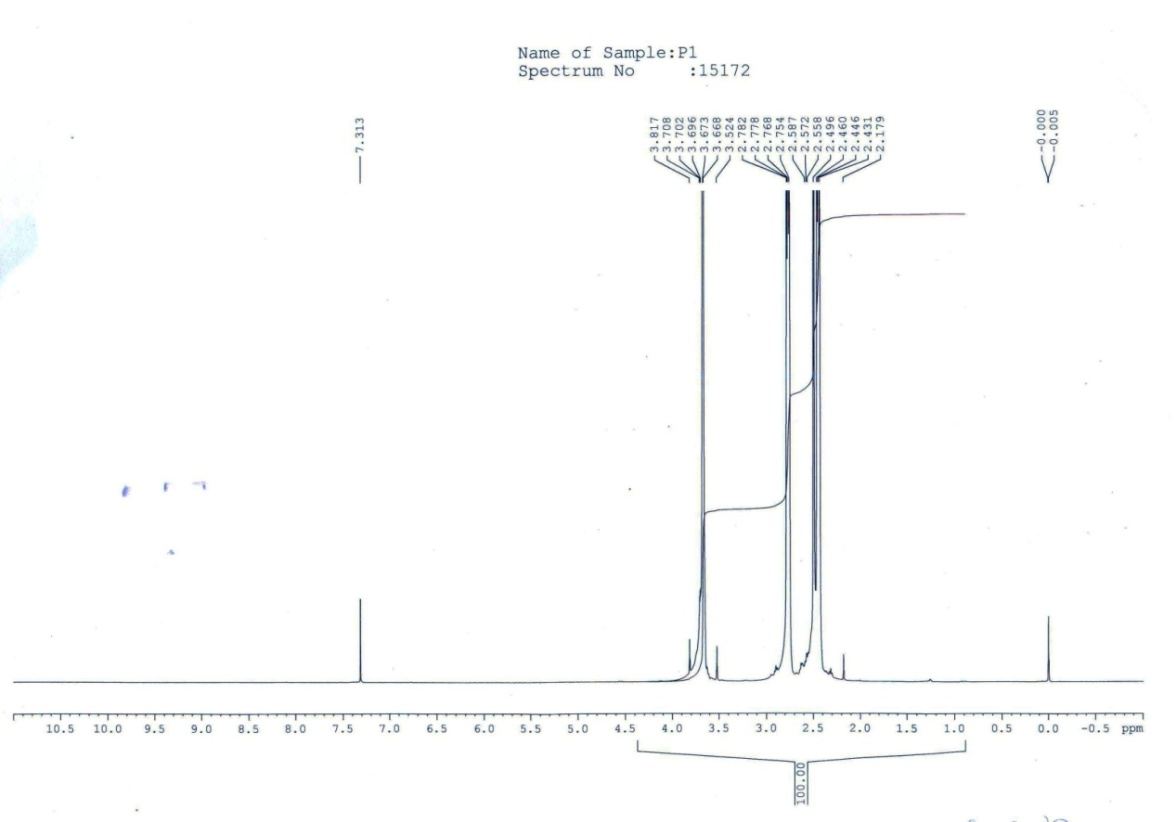


Fig. SI1


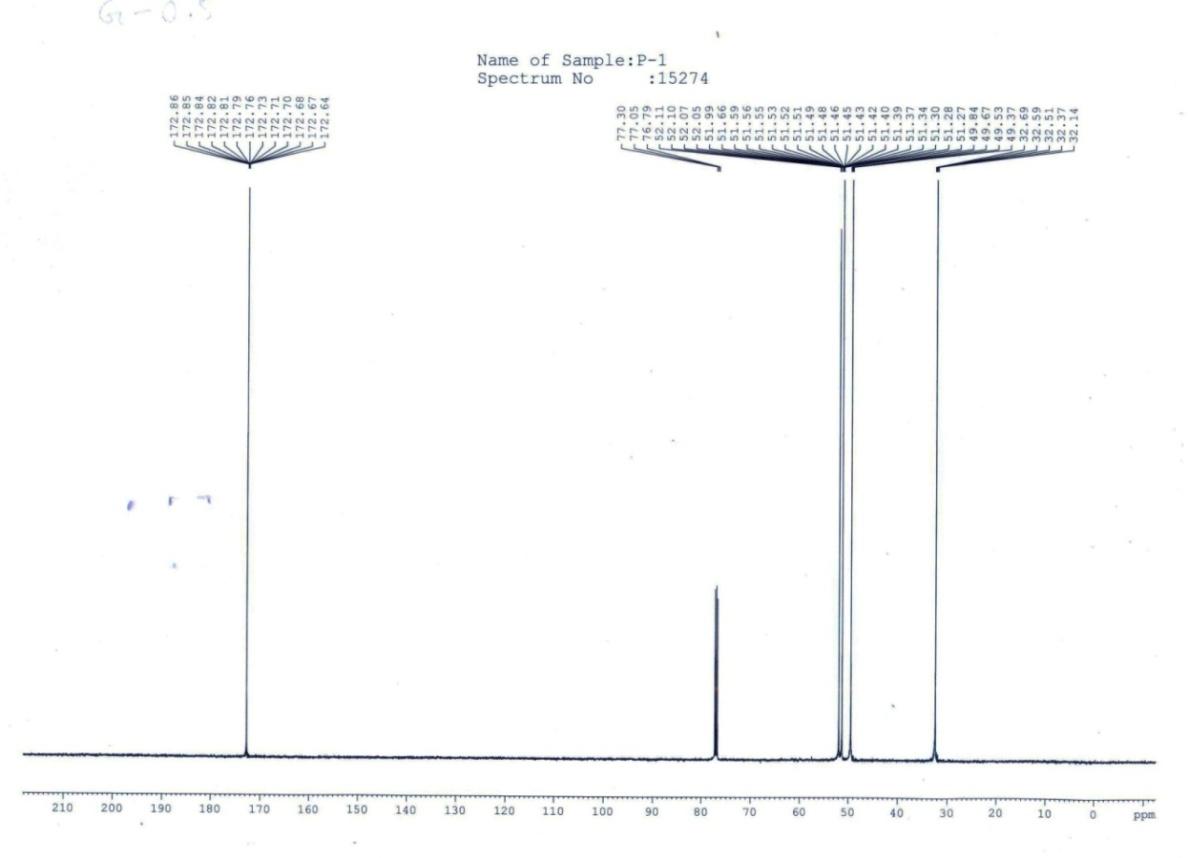


Fig. SI2


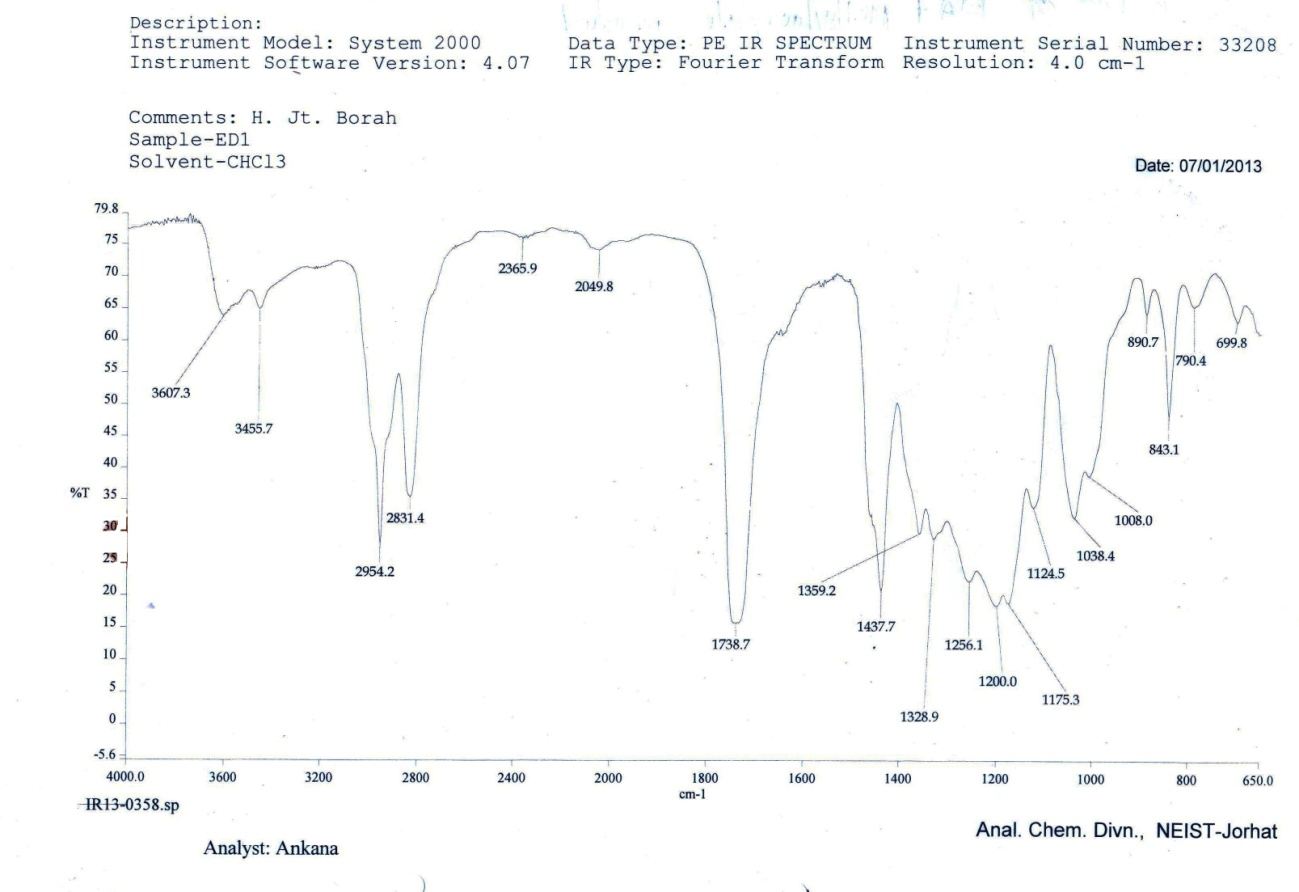


Fig. SI3


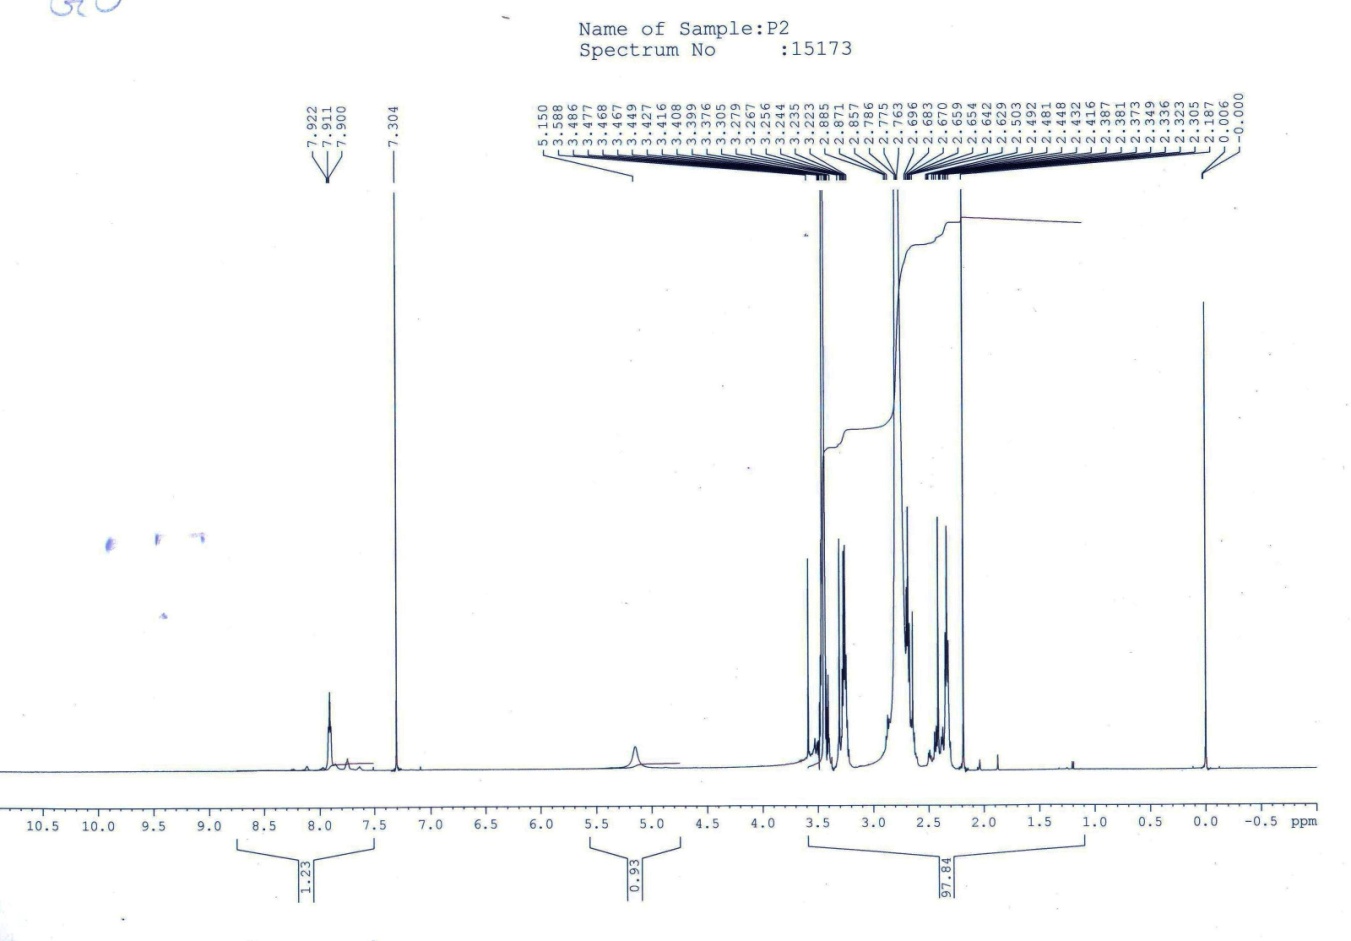


Fig. SI4


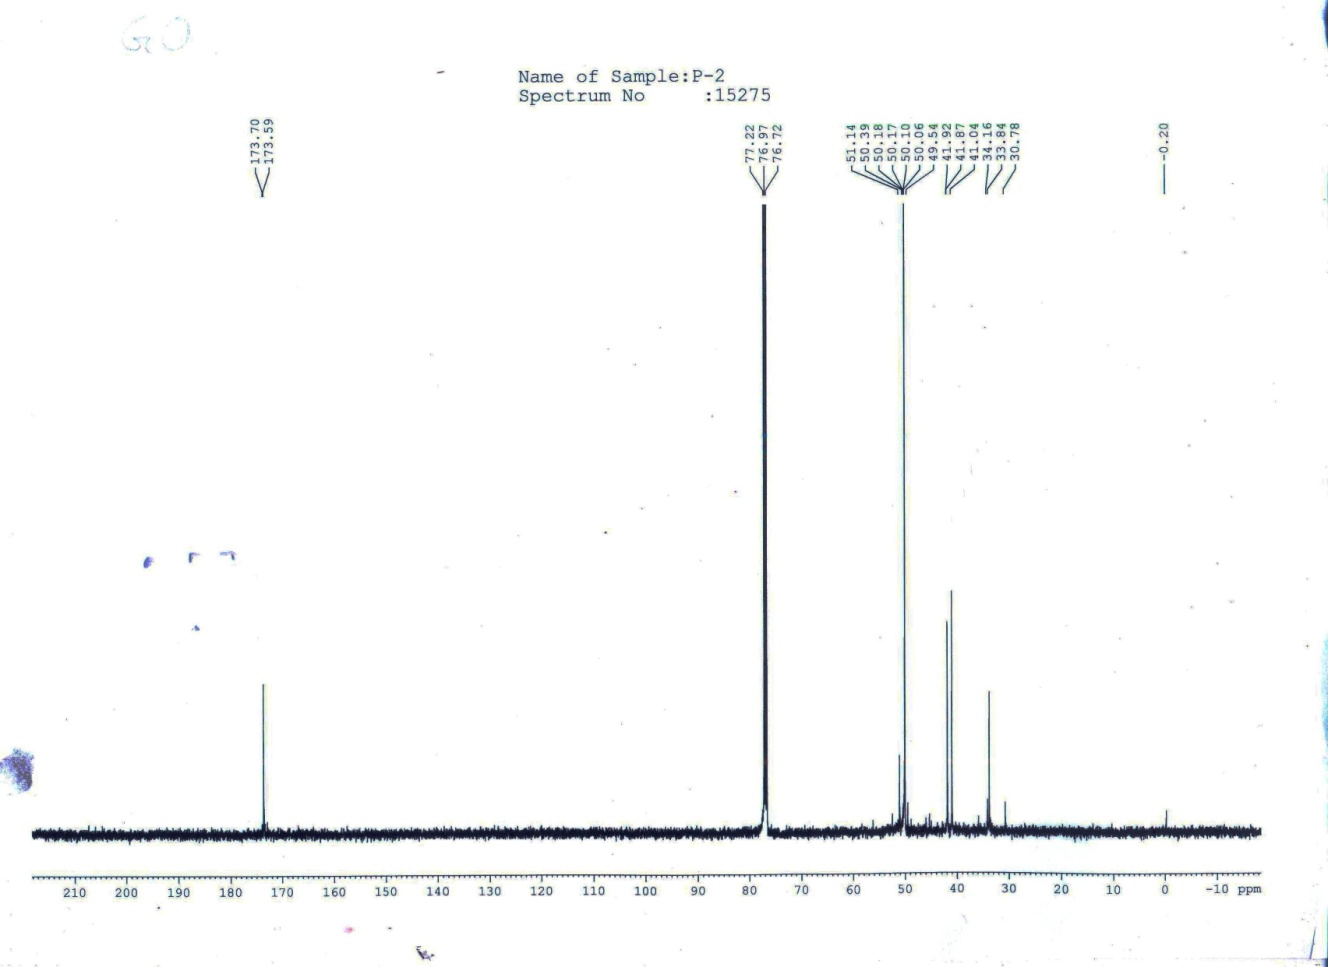


Fig. SI5


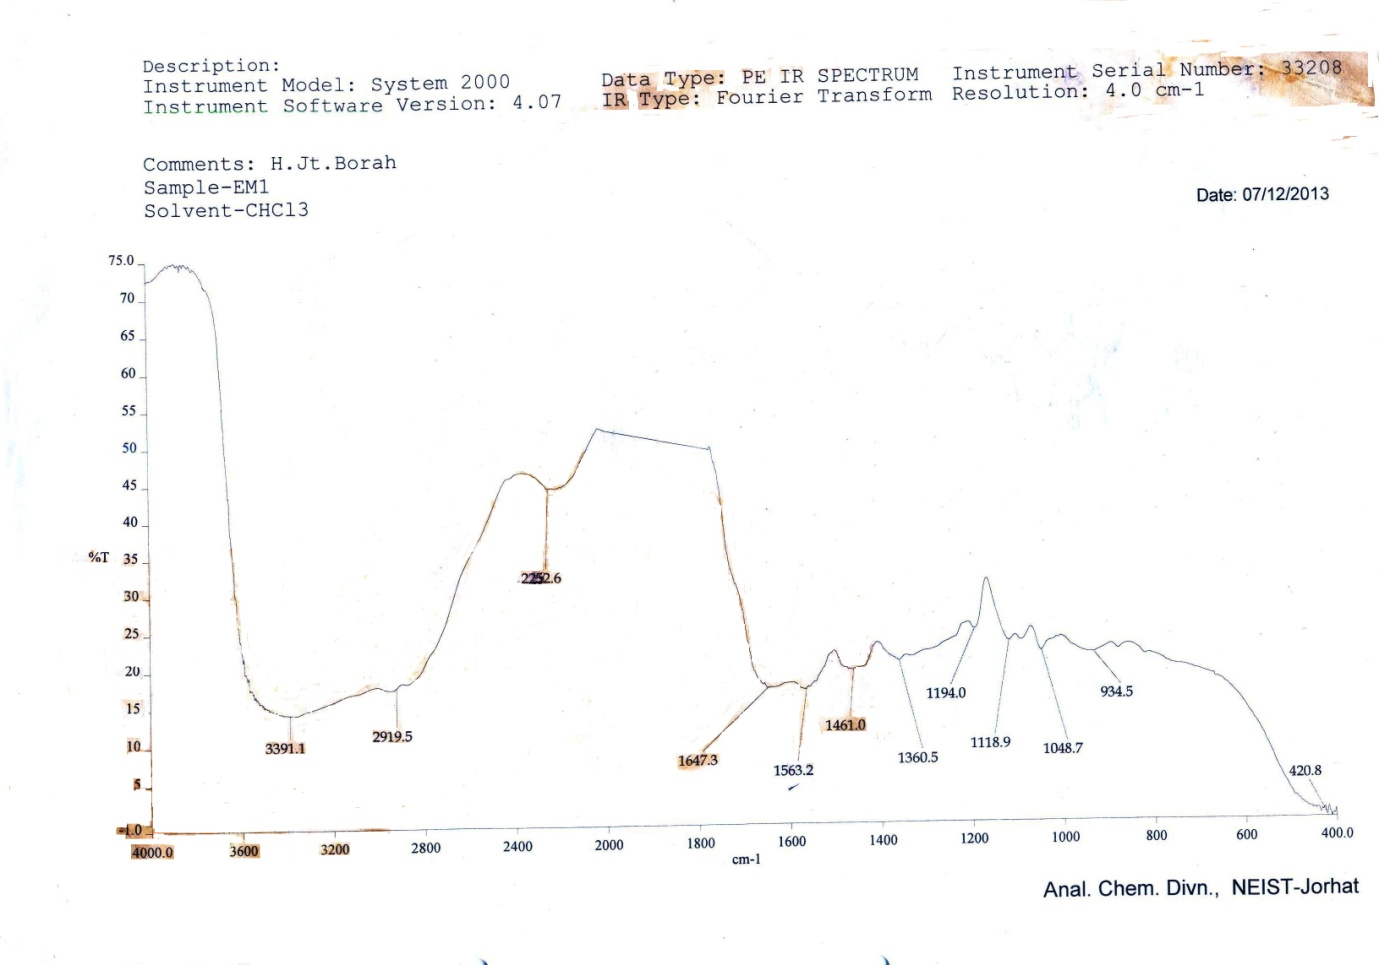


Fig. SI6


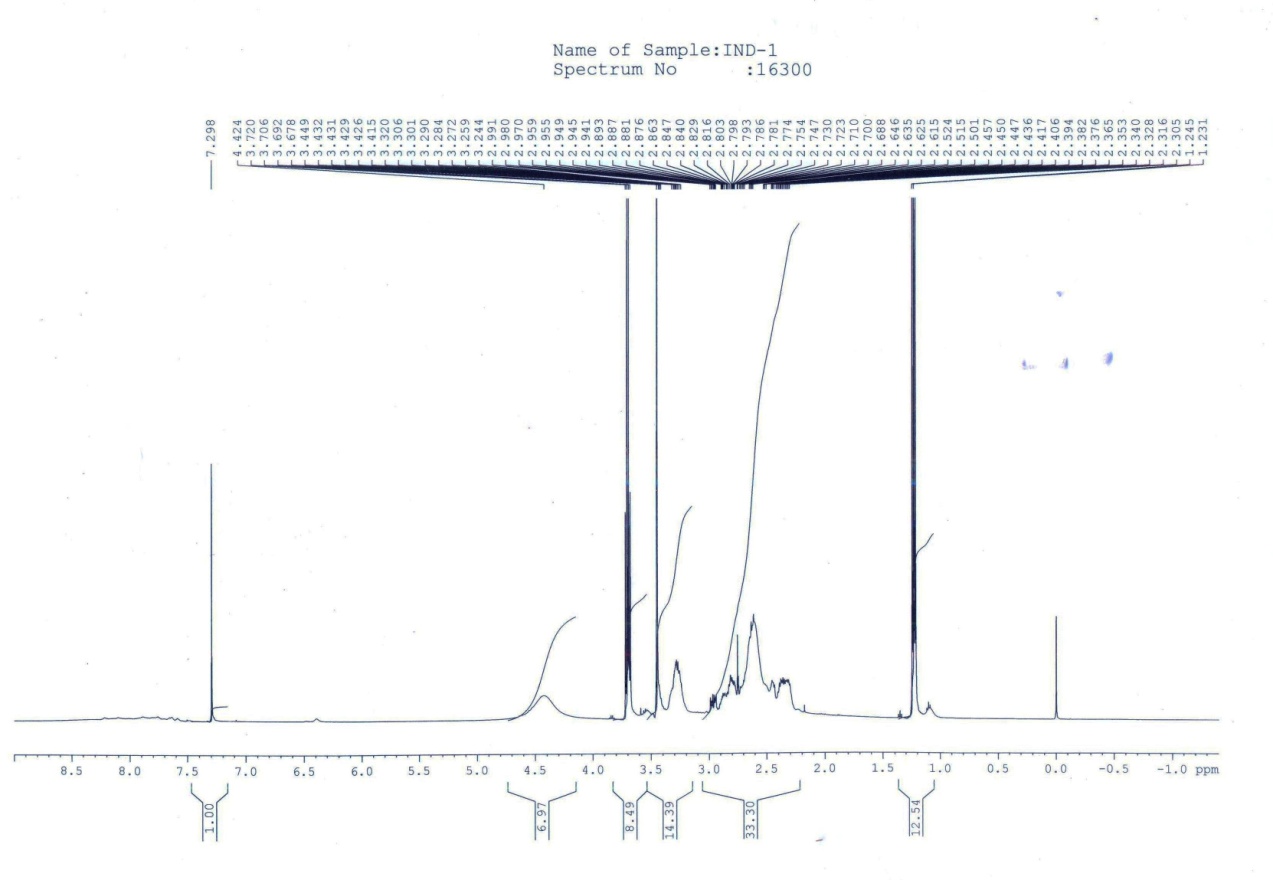


Fig. SI7


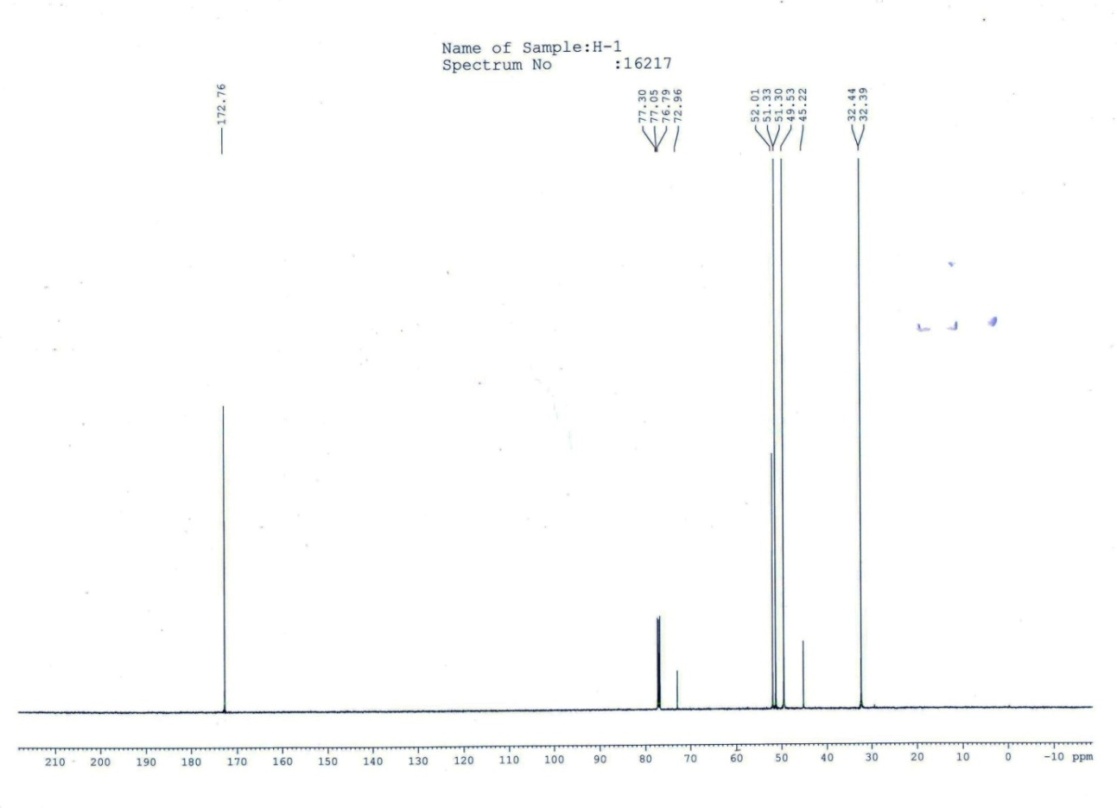


Fig. SI8


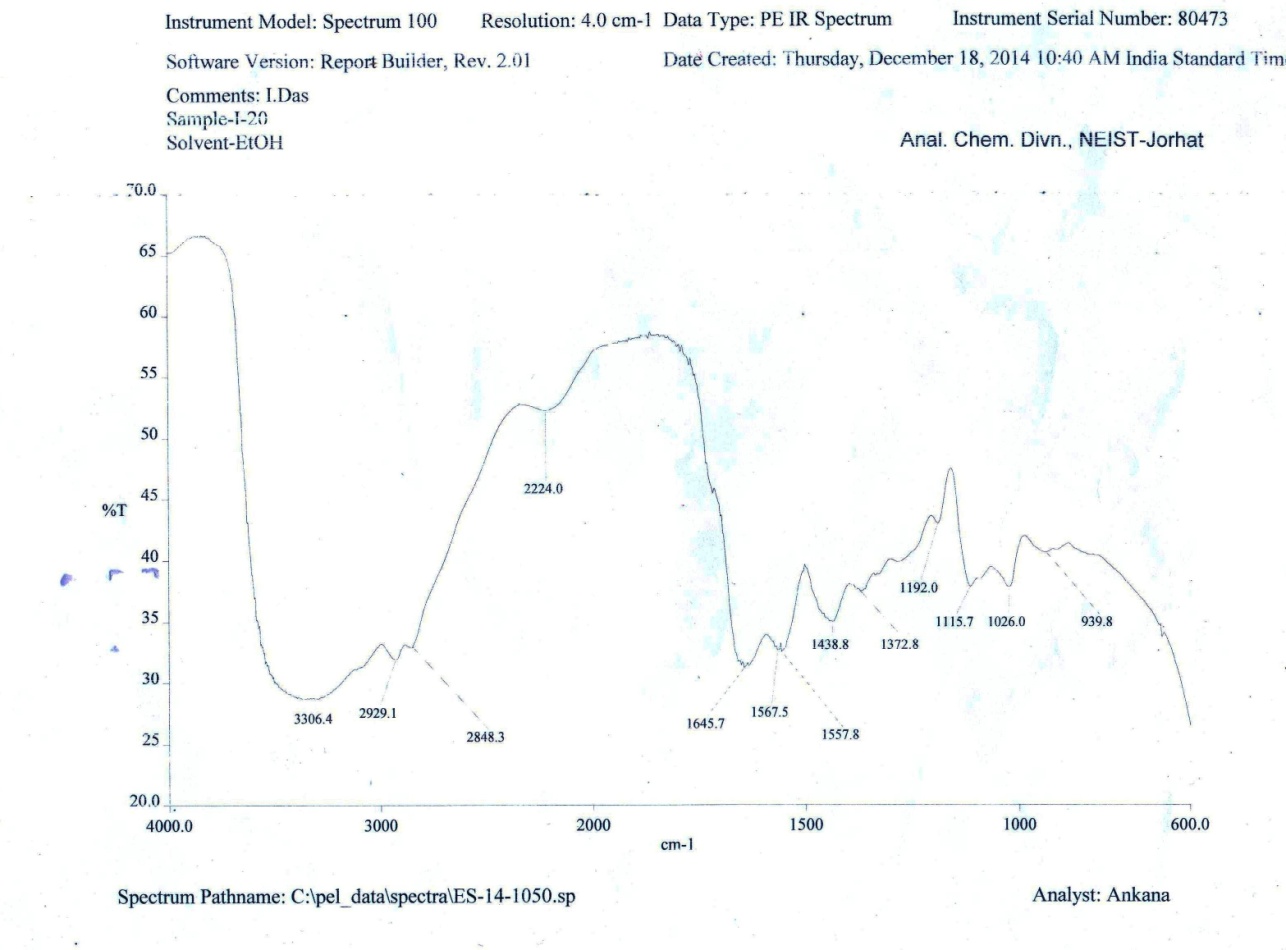


Fig. SI9
